# Supplementary material
Source: Research Square preprint supplement (doi:10.21203/rs.3.rs-8946692/v1)
Supplement: Supplementary file 1 [file 1bcd428dbea0a35a97fd741f.docx]

| **Table S1 Test of normality** | | | |  |  |  |  |  |
| --- | --- | --- | --- | --- | --- | --- | --- | --- |
|  |  |  |  |  |  |  |  |  |
| Area | Shapiro-Wilk | | |  | Depth | Shapiro-Wilk | | |
| Test statistic | Degree of freedom | p-value |  | Test statistic | Degree of freedom | p-value |
| V2 | 0.925 | 10 | 0.404 |  | V2 | 0.897 | 9 | 0.233 |
| V4 | 0.949 | 10 | 0.656 |  | V4 | 0.804 | 9 | 0.023 |
| V8 | 0.969 | 10 | 0.881 |  | V8 | 0.915 | 9 | 0.355 |
| V9 | 0.897 | 10 | 0.203 |  | V9 | 0.937 | 9 | 0.554 |
| V10 | 0.711 | 10 | 0.001 |  | V10 | 0.790 | 9 | 0.016 |
