# Supplementary material
Source: Research Square preprint supplement (doi:10.21203/rs.3.rs-8946692/v1)
Supplement: Supplementary file 2 [file 5649963ccfaebed4fb0c3e76.docx]

**Table 3: Wound area and wound depth across the five evaluated time points**

| **ID** | **Wound Area (cm2)** | | | | | **Wound Depth (mm)** | | | | |
| --- | --- | --- | --- | --- | --- | --- | --- | --- | --- | --- |
| V2 | V4 | V8 | V9 | V10 | V2 | V4 | V8 | V9 | V10 |
| BSM1-1 | 16.95 | 13.78 | 3.80 | 1.58 | 0.23 | NA | 1.52 | 0.73 | 0.22 | 0.25 |
| BSM1-2 | 20.25 | 12.99 | 4.84 | 3.05 | 0.83 | 1.17 | 0.79 | 0.42 | 0.45 | 0.51 |
| BSM1-3 | 27.56 | 17.06 | 6.40 | 5.25 | 3.65 | 1.33 | 0.55 | 0.24 | 0.19 | 0.97 |
| BSM1-4 | 20.25 | 7.85 | 1.08 | 0.13 | 0.03 | 3.00 | 2.74 | 0.65 | 0.19 | 0.59 |
| BSM1-5 | 29.03 | 10.67 | 1.97 | 0.00 | 0.00 | 2.61 | 2.74 | 0.41 | 0.00 | 0.00 |
| BSM1-6 | 14.49 | 18.33 | 5.34 | 0.83 | 0.00 | 4.55 | 1.35 | 0.48 | 0.25 | 0.00 |
| BSM1-7 | 9.23 | 9.35 | 3.42 | 4.22 | 2.73 | 0.98 | 1.01 | 0.56 | 0.55 | 0.28 |
| BSM1-8 | 2.54 | 5.35 | 2.99 | 1.05 | 0.53 | 1.50 | 2.59 | 2.12 | 1.19 | 1.20 |
| BSM1-9 | 4.42 | 3.76 | 0.01 | 3.40 | 3.69 | 0.40 | 0.32 | 0.20 | 0.18 | 0.21 |
| BSM1-10 | 4.20 | 3.30 | 0.67 | 0.00 | 0.00 | 2.31 | 2.61 | 0.20 | 0.00 | 0.00 |

BSM: Biosheet maker, NA: not applicable, V2: At embedding of BSM1, V4: At application of biococktail, V8: 1 month after application, V9: 2 months after application, V10: 3 months after application
