# Supplementary material
Source: Research Square preprint supplement (doi:10.21203/rs.3.rs-8946692/v1)
Supplement: Supplementary file 3 [file 598c79bba20de508c09c97f0.docx]

**Table 2: Quantitative yield of biococktails from each embedded device**

| **Trial ID** | **Device Number** | **Implantation  Site** | **Amount of  Biococktail  (g)** | **Area of  Biococktail  (cm2)** | **Wound Area (cm2)** | **Amount of  applied Biococktail  (g)** | **Applied Biococktail /Wound Area (g/cm2)** |
| --- | --- | --- | --- | --- | --- | --- | --- |
| BSM1-01 | 1 | RUA | 0.15 | 1.22 | 13.78 | 2.55 | 0.19 |
| 2* | LUA | 1.25 | 8.42 |
| 3* | RLA | 1.30 | 8.73 |
| 4 | LLA | 0.20 | 1.41 |
| BSM1-02 | 1 | LUC | 0.20 | 1.33 | 12.99 | 4.45 | 0.34 |
| 2 | LLC | 1.15 | 6.30 |
| 3* | RUA | 6.20 | 19.86 |
| 4 | LUA | 6.65 | 24.05 |
| BSM1-03 | 1* | RUA | 7.05 | 17.97 | 17.06 | 5.05 | 0.30 |
| 2* | LUA | 2.40 | 7.04 |
| 3 | RLA | 2.25 | 10.82 |
| 4 | LLA | 1.15 | 4.62 |
| BSM1-04 | 1* | RUA | 5.75 | 19.91 | 7.85 | 5.05 | 0.64 |
| 2 | LUA | 0.15 | 2.37 |
| 3* | RLA | 0.95 | 4.76 |
| 4* | LLA | 1.55 | 8.38 |
| BSM1-05 | 1 | RUA | 2.65 | 10.84 | 10.67 | 3.55 | 0.33 |
| 2* | LUA | 2.05 | 8.67 |
| 3 | RLA | 0.20 | 0.89 |
| 4* | LLA | 3.35 | 11.12 |
| BSM1-06 | 1 | RUA | 4.00 | 18.31 | 18.33 | 4.90 | 0.27 |
| 2 | LUA | 3.90 | 15.83 |
| 3* | RLA | 4.55 | 19.19 |
| 4* | LLA | 5.80 | 20.20 |
| BSM1-07 | 1 | RUC | 0.95 | 8.30 | 9.35 | 2.65 | 0.28 |
| 2 | RUA | 1.35 | 8.14 |
| 3* | RLA | 4.00 | 19.43 |
| BSM1-08 | 1* | RUA | 4.45 | 19.74 | 5.35 | 2.35 | 0.44 |
| 2 | LUA | 1.80 | 12.35 |
| BSM1-09 | 1 | RUA | 2.25 | 10.70 | 3.76 | 1.60 | 0.43 |
| 2 | LUA | 2.40 | 15.37 |
| 3 | RLA | 2.60 | 11.90 |
| 4* | LLA | 3.05 | 13.17 |
| BSM1-10 | 1 | RUA | 0.80 | 8.25 | 3.30 | 0.85 | 0.26 |
| 2 | LUA | 2.50 | 12.14 |
| 3* | RLA | 2.80 | 15.43 |
| 4 | LLA | 3.30 | 17.73 |
| Average |  |  | 2.62 | 11.48 | 10.24 | 3.30 | 0.35 |

***** The biococktail generated from this device was applied using the same device.

BSM: biosheet maker, LLA: left lower abdomen, LUA: left upper abdomen, LLC: left lower chest,

LUC: left lower chest, RLA: right lower abdomen, RUA: right upper abdomen, RUC: right upper chest
