# Supplementary material
Source: Research Square preprint supplement (doi:10.21203/rs.3.rs-8946692/v1)
Supplement: Supplementary file 4 [file a770ff77baf1ef4e76f7dbcc.docx]

**Table 1: Baseline characteristics and comorbidities of the enrolled patients**

| **Trial ID** | **Age (years)** | **Sex** | **Height (cm)** | **Weight (kg)** | **CONUT  Score** | **Diabetic Neuropathy** | **Diabetic Retinopathy** | **Diabetic Nephropathy** | **Target Site** | **LEAD** | **WIfI Stage** |
| --- | --- | --- | --- | --- | --- | --- | --- | --- | --- | --- | --- |
| BSM1-01 | 40 | F | 166 | 75.4 | 1 | Yes | Yes | CKD G2 | R | No | 3 |
| BSM1-02 | 71 | M | 171 | 50.2 | 7 | Yes | Yes | CKD G5D | R | Yes | 3 |
| BSM1-03 | 71 | F | 147 | 47.9 | 6 | Yes | Yes | CKD G3b | L | Yes | 4 |
| BSM1-04 | 50 | M | 172 | 92.0 | 3 | Yes | Yes | CKD G2 | L | No | 4 |
| BSM1-05 | 50 | M | 175 | 74.1 | 6 | Yes | Yes | CKD G2 | R | No | 4 |
| BSM1-06 | 74 | F | 158 | 56.8 | 6 | Yes | Yes | CKD G1 | R | No | 4 |
| BSM1-07 | 62 | M | 177 | 78.0 | 7 | Yes | Yes | CKD G5D | L | Yes | 3 |
| BSM1-08 | 60 | M | 162 | 59.3 | 4 | Yes | Yes | CKD G5D | L | Yes | 4 |
| BSM1-09 | 80 | M | 160 | 54.4 | 5 | Yes | No | CKD G4 | L | Yes | 4 |
| BSM1-10 | 52 | F | 158 | 97.0 | 2 | Yes | Yes | CKD G2 | L | No | 3 |

BSM: biosheet maker, CKD: chronic kidney disease, CONUT: controlling nutritional status, F: female, L: left, LEAD: lower extremity arterial disease, M: male, WIfI: wound, ischemia, foot infection
