# Supplementary material
Source: Research Square preprint supplement (doi:10.21203/rs.3.rs-8946692/v1)
Supplement: Supplementary file 6 [file ff8bcbba21358ee056ee5e57.docx]

| **Markers** | | | **Patient No.** | | **1** | | | | **2** | | | | | | | **3** | | | | | | |
| --- | --- | --- | --- | --- | --- | --- | --- | --- | --- | --- | --- | --- | --- | --- | --- | --- | --- | --- | --- | --- | --- | --- |
| **Mold No.** | | **2** | | **3** | | **1** | | **2** | **3** | | **4** | | **1** | | **2** | | **3** | **4** | |
| Mluripotent stem cell markers | | | *B3GALT5* | | 0 | | 0 | | 0 | | 0.02198827 | 0 | | 0.0067921 | | 0 | | 0.09561437 | | 0.10747895 | 0.01175976 | |
| *NANOG* | | 0.02114831 | | 0.03427211 | | 0.02533414 | | 0.02827893 | 0.02187519 | | 0 | | 0.01611912 | | 0.0180932 | | 0 | 0 | |
| Mesenchymal tem cell markers | | | *CD44* | | 2.22337643 | | 2.62739626 | | 2.79162646 | | 2.77049414 | 2.89025776 | | 2.81774031 | | 2.70973214 | | 2.30762879 | | 2.34572728 | 2.56727632 | |
| *TFRC* | | 1.52310456 | | 1.91787887 | | 1.79112814 | | 1.9943632 | 1.80908725 | | 1.86190913 | | 1.9979212 | | 1.77187224 | | 1.71729321 | 1.71307008 | |
| *NT5E* | | 1.0880711 | | 1.06007217 | | 1.55384844 | | 1.6938926 | 1.31649767 | | 1.6797151 | | 1.83434395 | | 1.56496743 | | 1.64696859 | 1.66120469 | |
| *THY1* | | 0.77825907 | | 1.58402163 | | 1.50992508 | | 1.51495031 | 1.05136368 | | 1.46123491 | | 2.1822954 | | 2.56274788 | | 2.52003029 | 2.06283253 | |
| *ENG* | | 2.40710109 | | 2.85419575 | | 2.50222941 | | 2.4907924 | 2.23797219 | | 2.3606981 | | 2.58249767 | | 2.68365407 | | 2.73738102 | 2.55651132 | |
| Fibroblast markers | | | *ACTA2* | | 0.99976022 | | 1.60981504 | | 1.69126826 | | 1.43988277 | 1.3670555 | | 1.4670665 | | 2.15611115 | | 3.08654666 | | 3.17687482 | 1.77456808 | |
| *TAGLN* | | 0.86673663 | | 1.38705512 | | 1.6158301 | | 1.27569054 | 1.09687592 | | 1.12969228 | | 1.7430435 | | 2.58850194 | | 2.573091 | 1.64529153 | |
| *CALD1* | | 0.48440492 | | 0.97840058 | | 1.5900065 | | 1.51917581 | 0.83530976 | | 1.31385828 | | 1.8084037 | | 2.36308566 | | 2.4744079 | 1.55906502 | |
| Endothelial cell marker | | | *PECAM1* | | 1.58354899 | | 1.83291564 | | 1.86606445 | | 1.71279304 | 1.68893204 | | 1.53282987 | | 1.64974956 | | 2.39399263 | | 2.49439078 | 1.67390185 | |
| Macrophage marker | | | *CD163* | | 2.53854313 | | 3.05334456 | | 3.09090076 | | 3.09899815 | 2.50303291 | | 2.82429817 | | 2.71180081 | | 2.87047884 | | 2.80168465 | 3.11016365 | |
| *CD68* | | 3.10448794 | | 3.29910214 | | 3.49172691 | | 3.52169108 | 3.5759817 | | 3.60839208 | | 3.57404987 | | 3.0610295 | | 2.9202293 | 3.50739059 | |
| Growth factors | | | *VEGFA* | | 2.21534131 | | 2.30940891 | | 2.73302995 | | 2.67229172 | 2.81425144 | | 2.66055215 | | 2.64678384 | | 2.05755132 | | 2.15608339 | 2.77472219 | |
| *HGF* | | 0.0826326 | | 0.30353547 | | 0.31021559 | | 0.33604982 | 0.06950846 | | 0.22688354 | | 0.69913955 | | 0.88883187 | | 0.97654007 | 0.14558416 | |
| *EGF* | | 0.3168239 | | 0.07365393 | | 0.04194761 | | 0 | 0.1571695 | | 0.04274082 | | 0.03971225 | | 0.01532129 | | 0 | 0.02531824 | |
| *TGFB1* | | 2.65276502 | | 2.7212638 | | 2.50412478 | | 2.47274626 | 2.60098359 | | 2.64742369 | | 2.73507979 | | 2.32483103 | | 2.21749386 | 2.60196886 | |
| *PDGFA* | | 0.81739668 | | 1.21013418 | | 0.62334345 | | 0.56690018 | 0.78357979 | | 0.71168859 | | 1.21388945 | | 1.43474482 | | 1.49030946 | 1.0532059 | |
| *NGF* | | 0.01398807 | | 0.0582864 | | 0.09216519 | | 0.07060517 | 0.05520502 | | 0.02266769 | | 0.25375559 | | 0.5454902 | | 0.58697798 | 0.25359734 | |
| Cytokines | | | *IL1B* | | 1.94662957 | | 1.80801429 | | 2.12478036 | | 2.16227344 | 2.24120419 | | 2.10083608 | | 1.8470009 | | 1.50771306 | | 1.52943808 | 1.65573216 | |
| *IL6* | | 1.35931062 | | 1.72748625 | | 1.33682079 | | 1.53968005 | 1.09457471 | | 1.39905142 | | 1.61845043 | | 1.78731864 | | 1.90105749 | 2.43967337 | |
| *IL10* | | 0.79225573 | | 1.05094917 | | 1.08025574 | | 1.21596924 | 0.93299333 | | 0.94741846 | | 0.59521837 | | 1.0992224 | | 1.06194825 | 1.03064912 | |
| Extracellular markers | | | *COL1A1* | | 3.03313991 | | 3.9148664 | | 4.05996874 | | 3.91888785 | 3.09462194 | | 3.88296056 | | 4.25439714 | | 4.73985597 | | 4.65302106 | 4.36207751 | |
| *COL1A2* | | 2.63999179 | | 3.46008321 | | 3.76262089 | | 3.66880624 | 2.92282662 | | 3.60899102 | | 3.95909782 | | 4.4150379 | | 4.31373383 | 4.00945572 | |
| *ELN* | | 0.23333717 | | 1.12247375 | | 0.37213739 | | 0.40115606 | 0.7188653 | | 0.22510973 | | 0.82346167 | | 0.97726661 | | 0.98807761 | 0.86044677 | |
|  |  | |  | |  | |  | |  | |  |  | |  | |  | |  | |  |  | |
| **4** | | | | | | **5** | | | | | | | **6** | | | | | | | | |
| **1** | | **3** | | **4** | | **1** | | **2** | | **4** | | | **1** | | **2** | | **3** | | **4** | | |
| 0.00616295 | | 0 | | 0 | | 0.04429268 | | 0 | | 0 | | | 0.04267861 | | 0.05374328 | | 0 | | 0 | | |
| 0.01579179 | | 0.01585332 | | 0.01585332 | | 0.07388977 | | 0 | | 0.15336215 | | | 0 | | 0.04679727 | | 0 | | 0 | | |
| 2.78881463 | | 2.92604782 | | 2.92604782 | | 2.57339672 | | 2.75717768 | | 2.69506049 | | | 1.83931307 | | 2.62166216 | | 2.64495977 | | 1.55694224 | | |
| 1.76556324 | | 1.88161776 | | 1.88161776 | | 1.89237999 | | 2.11031 | | 2.0078139 | | | 0.97390729 | | 1.86127511 | | 1.90691677 | | 0.65513646 | | |
| 1.44168483 | | 1.38964044 | | 1.38964044 | | 1.41194036 | | 1.53394967 | | 1.57527298 | | | 1.25973784 | | 1.64911828 | | 1.74325628 | | 1.09249301 | | |
| 1.00776124 | | 1.02435291 | | 1.02435291 | | 1.70080632 | | 1.32284741 | | 1.09155739 | | | 2.20994508 | | 2.22709237 | | 1.55849627 | | 2.00690109 | | |
| 2.40831213 | | 2.39610992 | | 2.39610992 | | 2.71841787 | | 2.50177289 | | 2.73796917 | | | 2.70636826 | | 2.86856776 | | 2.93084876 | | 2.63184844 | | |
| 1.4090063 | | 1.31602807 | | 1.31602807 | | 1.80328014 | | 1.76240415 | | 1.43985662 | | | 2.65666028 | | 2.93033667 | | 2.22298839 | | 2.39206017 | | |
| 1.04052996 | | 1.0109584 | | 1.0109584 | | 1.56324373 | | 1.35717876 | | 1.35484309 | | | 2.70497953 | | 2.53119963 | | 1.87767154 | | 2.62448054 | | |
| 0.76424907 | | 0.74306621 | | 0.74306621 | | 1.60484711 | | 1.28688918 | | 1.09179772 | | | 2.18213202 | | 2.21216205 | | 1.57372648 | | 2.10754636 | | |
| 1.5245235 | | 1.67094064 | | 1.67094064 | | 1.88582173 | | 1.88627763 | | 1.90502313 | | | 1.93475144 | | 2.21757508 | | 2.02699044 | | 1.79681167 | | |
| 2.77882045 | | 3.07154332 | | 3.07154332 | | 3.23540826 | | 2.93718049 | | 3.28289702 | | | 2.69912985 | | 3.28065874 | | 3.38561988 | | 2.51787443 | | |
| 3.74076764 | | 3.66400684 | | 3.66400684 | | 3.50817371 | | 3.68902005 | | 3.54721541 | | | 2.40160194 | | 3.3703239 | | 3.57722287 | | 2.09244162 | | |
| 2.6165087 | | 2.6485143 | | 2.6485143 | | 2.69720381 | | 2.49292113 | | 2.78902214 | | | 2.04614146 | | 2.40600812 | | 2.21660645 | | 2.03342579 | | |
| 0.11069445 | | 0.22172739 | | 0.22172739 | | 0.52332895 | | 0.51806069 | | 0.47367918 | | | 0.22381138 | | 0.6150904 | | 0.54213299 | | 0.13410506 | | |
| 0.28729104 | | 0.01341927 | | 0.01341927 | | 0.03272957 | | 0.0315115 | | 0 | | | 0.04646412 | | 0.14118011 | | 0 | | 0 | | |
| 2.80663711 | | 2.59452633 | | 2.59452633 | | 2.40269817 | | 2.53138224 | | 2.47032315 | | | 2.2536332 | | 2.45396116 | | 2.37775528 | | 2.2697643 | | |
| 0.62393013 | | 0.62524157 | | 0.62524157 | | 0.83683465 | | 0.74837511 | | 0.773548 | | | 1.53109883 | | 1.55690688 | | 0.92366368 | | 1.6458954 | | |
| 0.07712356 | | 0.0206822 | | 0.0206822 | | 0.17220543 | | 0.09129109 | | 0 | | | 0.1837032 | | 0.16070552 | | 0 | | 0 | | |
| 1.78801055 | | 1.76309683 | | 1.76309683 | | 1.64967095 | | 1.51786952 | | 1.89981174 | | | 0.78700987 | | 1.7316883 | | 1.84608876 | | 0.3827212 | | |
| 0.80083695 | | 1.17293644 | | 1.17293644 | | 1.47010658 | | 1.05115619 | | 1.93350248 | | | 1.54680357 | | 1.47862351 | | 1.51851652 | | 1.84326311 | | |
| 0.83371172 | | 1.01094481 | | 1.01094481 | | 1.30086263 | | 1.11271031 | | 1.41786806 | | | 0.33864946 | | 1.01031044 | | 1.32428974 | | 0 | | |
| 3.218795 | | 3.22649639 | | 3.22649639 | | 4.6708949 | | 3.74162736 | | 3.77650028 | | | 5.49796036 | | 4.84317575 | | 3.91182587 | | 5.60109502 | | |
| 2.99355339 | | 2.93480146 | | 2.93480146 | | 4.23263069 | | 3.46416462 | | 3.44416261 | | | 4.98325428 | | 4.47558014 | | 3.6109613 | | 4.94153558 | | |
| 0.56103176 | | 0.2749186 | | 0.2749186 | | 0.52027166 | | 0.18456492 | | 0.50244388 | | | 1.16161234 | | 1.11037784 | | 0.69703001 | | 1.29840836 | | |
|  | |  | |  | |  | |  | |  | | |  | |  | |  | |  | | |
| **7** | | | | | | **8** | | | | **9** | | | | | | | | |
| **1** | | **2** | | **3** | | **1** | | **2** | | **1** | | | **2** | | **3** | | **4** | |
| 0.02825582 | | 0 | | 0.03556723 | | 0.01314634 | | 0 | | 0.01778843 | | | 0.01791816 | | 0.03746705 | | 0 | |
| 0 | | 0 | | 0.08676203 | | 0.1200894 | | 0.17643541 | | 0.04466975 | | | 0 | | 0.04794803 | | 0 | |
| 2.63897911 | | 2.64862752 | | 2.62959332 | | 2.48823411 | | 2.6595358 | | 2.31241162 | | | 2.75694562 | | 2.26782265 | | 2.86160546 | |
| 1.89332422 | | 1.86371285 | | 1.86119594 | | 1.55529001 | | 1.68540188 | | 1.48646467 | | | 1.87736973 | | 1.48898908 | | 1.90542437 | |
| 1.76403395 | | 1.7459529 | | 1.9369467 | | 1.20319922 | | 0.97063958 | | 1.25238498 | | | 1.73524671 | | 1.58377203 | | 1.71549343 | |
| 1.42551679 | | 1.2304657 | | 1.825785 | | 1.78309534 | | 0.98403988 | | 1.98907059 | | | 2.01678462 | | 2.2463135 | | 1.33716223 | |
| 2.69408113 | | 2.62229022 | | 2.73351859 | | 2.73941223 | | 2.47372318 | | 2.752749 | | | 2.53507325 | | 2.72856025 | | 2.51015623 | |
| 1.79366339 | | 1.50271242 | | 2.28201661 | | 1.9509913 | | 1.33631466 | | 2.46048139 | | | 2.60766592 | | 2.60424933 | | 1.80013377 | |
| 1.42753162 | | 1.21802747 | | 2.00226611 | | 1.70481887 | | 1.61304706 | | 2.12897282 | | | 1.94209825 | | 2.18540545 | | 1.47494531 | |
| 1.46265664 | | 1.33922448 | | 1.95621868 | | 1.36226189 | | 0.87826875 | | 1.94839236 | | | 1.98751328 | | 2.16846886 | | 1.40010417 | |
| 2.10619007 | | 1.9423829 | | 1.94904122 | | 1.85303094 | | 1.63084604 | | 2.41945519 | | | 2.33516105 | | 2.44469803 | | 2.01153854 | |
| 3.216086 | | 3.22766837 | | 3.16858812 | | 2.90319145 | | 2.74575533 | | 3.08372679 | | | 2.98480299 | | 3.0998607 | | 3.21974545 | |
| 3.71647485 | | 3.6123674 | | 3.35505823 | | 3.30484742 | | 3.24468044 | | 3.06940894 | | | 3.36340745 | | 3.02953764 | | 3.50095645 | |
| 2.67665421 | | 2.58974413 | | 2.59371034 | | 2.81705302 | | 3.16495412 | | 2.59729208 | | | 2.70891531 | | 2.19386064 | | 2.78154605 | |
| 0.53636308 | | 0.43143562 | | 0.48332387 | | 0.14653967 | | 0 | | 0.45947607 | | | 0.73730143 | | 0.82095293 | | 0.52033803 | |
| 0 | | 0.06099056 | | 0.03874974 | | 0.05477848 | | 0 | | 0 | | | 0.0734409 | | 0 | | 0 | |
| 2.40979906 | | 2.3627426 | | 2.42629011 | | 2.58967688 | | 2.73599596 | | 2.42947051 | | | 2.33369771 | | 2.25914949 | | 2.42423524 | |
| 0.60697928 | | 0.65986268 | | 1.20675865 | | 1.29732163 | | 0.85588166 | | 1.37198324 | | | 1.20640446 | | 1.20323271 | | 0.54433541 | |
| 0.08938028 | | 0 | | 0.23685569 | | 0 | | 0 | | 0.43224317 | | | 0.26929909 | | 0.53784961 | | 0.21934736 | |
| 1.48151653 | | 1.68703425 | | 1.5989666 | | 1.88418804 | | 1.72956751 | | 1.42303131 | | | 1.85042778 | | 1.01117559 | | 2.02597185 | |
| 1.57166416 | | 1.3727269 | | 1.76493468 | | 1.08689498 | | 1.06669233 | | 1.9018714 | | | 1.29019951 | | 1.61905174 | | 1.58870949 | |
| 1.37013617 | | 1.29934289 | | 1.25012591 | | 0.839162 | | 0.58338058 | | 0.98258515 | | | 1.06437954 | | 0.94603491 | | 1.11922812 | |
| 4.02122332 | | 3.88126163 | | 4.65331458 | | 4.79055338 | | 4.17428453 | | 5.16188896 | | | 4.14804536 | | 5.04985726 | | 3.95831051 | |
| 3.78816987 | | 3.61106088 | | 4.35384637 | | 4.36856722 | | 3.65163036 | | 4.6705519 | | | 3.92730216 | | 4.68568626 | | 3.70483075 | |
| 0.4870204 | | 0.08357248 | | 0.67002435 | | 0.26749399 | | 0.0927734 | | 1.29073285 | | | 0.40752301 | | 1.62799229 | | 0.48889816 | |
|  | |  | |  | |  | |  | |  | | |  | |  | |  | |

| **10** | | | |
| --- | --- | --- | --- |
| **1** | **2** | **3** | **4** |
| 0.02058465 | 0.02790472 | 0 | 0 |
| 0.09744328 | 0.1283659 | 0.07373346 | 0.08191643 |
| 2.37938588 | 2.56598462 | 2.85507439 | 2.76631251 |
| 1.77741092 | 1.84324672 | 1.99981791 | 2.04083199 |
| 1.60417653 | 1.83044483 | 2.03989973 | 1.99844997 |
| 1.82851104 | 1.59252681 | 1.64965906 | 1.57035135 |
| 2.84319743 | 2.72704921 | 2.56496217 | 2.80238805 |
| 1.81508922 | 1.65803994 | 1.75708187 | 1.57352743 |
| 1.79598558 | 1.62457221 | 1.35387667 | 1.47683262 |
| 1.74748379 | 1.52727829 | 1.58674058 | 1.44380904 |
| 2.0544765 | 1.9387417 | 1.98993482 | 2.07424178 |
| 3.2370434 | 3.23635949 | 3.12651429 | 3.3101293 |
| 3.23853177 | 3.43937833 | 3.58047729 | 3.53548924 |
| 3.02550337 | 3.21330592 | 2.96962401 | 2.88929884 |
| 0.63448371 | 0.35251601 | 0.53593106 | 0.4650804 |
| 0.04381736 | 0.11068305 | 0.0914155 | 0.03647237 |
| 2.50767182 | 2.63345093 | 2.43206952 | 2.43431927 |
| 1.01805258 | 0.80890767 | 0.79506634 | 0.98415576 |
| 0.49761652 | 0.16171702 | 0.32064857 | 0.14875563 |
| 1.12665499 | 1.79344922 | 2.28006843 | 2.06655813 |
| 1.83858873 | 1.81126403 | 1.68663787 | 1.74964618 |
| 1.29829065 | 1.21703061 | 1.12757793 | 1.36498254 |
| 4.99812487 | 4.49549934 | 4.18496534 | 4.16583647 |
| 4.58825455 | 4.16074034 | 3.96721567 | 3.87010531 |
| 1.13669714 | 0.85295933 | 0.64415679 | 0.71533943 |
|  |  |  |  |

Table S2 **Transcriptomic profiling of in vivo–assembled Biococktails**
