# Supplementary material
Source: Research Square preprint supplement (doi:10.21203/rs.3.rs-8946692/v1)
Supplement: Supplementary file 7 [file ffde05360d81ed6990e58047.docx]

**Table 4: WIfI classification of each patient at baseline (V1) and 3 months after biococktail application (V10)**

| Visit | V1 | | | | V10 | | | |
| --- | --- | --- | --- | --- | --- | --- | --- | --- |
| WIfI | W | I | fI | Stage | W | I | fI | Stage |
| BSM1-01 | 2 | 0 | 2 | 3 | 1 | 0 | 0 | 1 |
| BSM1-02 | 3 | 0 | 0 | 3 | 1 | 1 | 0 | 1 |
| BSM1-03 | 3 | 1 | 1 | 4 | 1 | 0 | 0 | 1 |
| BSM1-04 | 3 | 0 | 2 | 4 | 1 | 0 | 0 | 1 |
| BSM1-05 | 3 | 0 | 2 | 4 | 0 | 0 | 0 | 1 |
| BSM1-06 | 3 | 0 | 2 | 4 | 0 | 1 | 0 | 1 |
| BSM1-07 | 2 | 1 | 1 | 3 | 1 | 0 | 0 | 1 |
| BSM1-08 | 2 | 2 | 2 | 4 | 1 | 2 | 1 | 2 |
| BSM1-09 | 3 | 1 | 0 | 4 | 3 | 1 | 0 | 4 |
| BSM1-10 | 3 | 0 | 0 | 3 | 0 | 0 | 0 | 1 |

V1: At the time of trial registration, V10: 3 months after biococktail application, WIfI: Wound, Ischemia, foot Infection
